# Supplementary material
Source: PubMed Central journal article supplement (PMC5881052)
Supplement: AEM.00114-18_zam008188425s1.pdf [file AEM.00114-18_zam008188425s1.pdf]

**Supplementary information for:**

**A novel dual-*cre* motif enables two-way autoregulation of CcpA in  
*Clostridium acetobutylicum***

Running title: CcpA autoregulation

Lu Zhang<sup>1,2</sup>, Yanqiang Liu<sup>1,2</sup>, Yunpeng Yang<sup>1,2</sup>, Weihong Jiang<sup>1,3\*</sup>, Yang Gu<sup>1,4\*</sup>

<sup>1</sup>Key Laboratory of Synthetic Biology, CAS Center for Excellence in Molecular Plant Sciences, Shanghai Institute of Plant Physiology and Ecology, Chinese Academy of Sciences, Shanghai 200032, China, <sup>2</sup>University of Chinese Academy of Sciences, Beijing 100049, China, <sup>3</sup>Jiangsu National Synergetic Innovation Center for Advanced Materials, SICAM, 200 North Zhongshan Road, Nanjing 210009, China and <sup>4</sup>Shanghai Collaborative Innovation Center for Biomanufacturing Technology, 130 Meilong Road, Shanghai 200237, China.

To whom correspondence should be addressed. Weihong Jiang, 300 Fenglin Road, Shanghai, China. Tel: 86-21-54924172; Fax: 86-21-54924015. E-mail: whjiang@sibs.ac.cn. Correspondence may also be addressed to Yang Gu, 300 Fenglin Road, Shanghai, China. Tel: 86-21-54924178; Fax: 86-21-54924015. E-mail: ygu02@sibs.ac.cn

**Table S1** Primers used in this study.

| Primer name                       | Sequence (5'-3')                                         | Description                            |
|-----------------------------------|----------------------------------------------------------|----------------------------------------|
| <i>P<sub>ccpA</sub>Amut</i> -for  | taagtataggggatataacaatagaaaatttgcggt                     | forward primer used for overexpression |
| <i>P<sub>ccpA</sub>Amut</i> -rev  | aacgcaaatttctattgttatatcccctatactta                      | reverse primer used for overexpression |
| <i>P<sub>ccpA</sub>-PstI</i> -for | taatcttttcataaaaaatcactcctataa                           | forward primer used for overexpression |
| <i>P<sub>ccpA</sub>-lacZ</i> -rev | ttataggagtgattttatgagaaagatta                            | reverse primer used for overexpression |
| <i>lacZ-P<sub>ccpA</sub></i> -for | ataggaataatctttctcactcatgtaaataac                        | forward primer used for overexpression |
| <i>lacZ-SmaI</i> -rev             | atggagttattacatgagatgagaaagattatt                        | reverse primer used for overexpression |
| <i>lacZ-ccpA</i> -for             | ataggaataatctttctcactcatgtaaataac                        | forward primer used for overexpression |
| <i>ccpA-lacZ</i> -rev             | atggagttattacatgagatgagaaagattatt                        | reverse primer used for overexpression |
| <i>ccpA<sub>mut</sub></i> -for    | cagatttagatatacgaaggagaaggactatattag<br>agttcttaaggaga   | forward primer used for overexpression |
| <i>ccpA<sub>mut</sub></i> -rev    | tctccttaagaactctaataatagtccttctccttcgatat<br>atctaaatctg | reverse primer used for overexpression |
| <i>P<sub>ihl</sub>-PstI</i> -for  | aaaactgcagttttaacaaaatata                                | forward primer used for overexpression |
| <i>P<sub>ihl</sub>-ccpA</i> -rev  | ttaatagaggcagccattctaactaacctcctaa                       | reverse primer used for overexpression |
| <i>ccpA-P<sub>ihl</sub></i> -for  | ttaggaggttagtgaatggctgcctctattaa                         | forward primer used for overexpression |
| <i>ccpA-EcoRI</i> -rev            | ccggaattcttattacatgaatc                                  | reverse primer used for overexpression |
| M-L1-for                          | tataggtatataacaatag                                      | forward primer used for EMSA           |
| M-L1-rev                          | ctattgttatataacctata                                     | reverse primer used for EMSA           |
| M-L2-for                          | tatatattatataacaatag                                     | forward primer used for EMSA           |
| M-L2-rev                          | ctattgttatataatata                                       | reverse primer used for EMSA           |
| M-L3-for                          | tatatggtatataacaatag                                     | forward primer used for EMSA           |
| M-L3-rev                          | ctattgttatataacctata                                     | reverse primer used for EMSA           |
| M-L4-for                          | tatatgtgatataacaatag                                     | forward primer used for EMSA           |
| M-L4-rev                          | ctattgttatataccatata                                     | reverse primer used for EMSA           |
| M-L5-for                          | tatatggtgataacaatag                                      | forward primer used for EMSA           |
| M-L5-rev                          | ctattgttataacaatata                                      | reverse primer used for EMSA           |
| M-L6-for                          | tatatgtagataacaatag                                      | forward primer used for EMSA           |
| M-L6-rev                          | ctattgttatcaaatata                                       | reverse primer used for EMSA           |
| M-R1-for                          | tatatggtat gtaacaatag                                    | forward primer used for EMSA           |
| M-R1-rev                          | ctattgttac ataacaatata                                   | reverse primer used for EMSA           |
| M-R2-for                          | tatatgttata gaacaatag                                    | forward primer used for EMSA           |
| M-R2-rev                          | ctattgttctataacaatata                                    | reverse primer used for EMSA           |
| M-R3-for                          | tatatgttatat gacaatag                                    | forward primer used for EMSA           |
| M-R3-rev                          | ctattgtcatataacaatata                                    | reverse primer used for EMSA           |
| M-R4-for                          | tatatgttatata gcaatag                                    | forward primer used for EMSA           |
| M-R4-rev                          | ctattgtctataacaatata                                     | reverse primer used for EMSA           |
| M-R5-for                          | tatatgttatataaa aaatag                                   | forward primer used for EMSA           |
| M-R5-rev                          | ctattttatataacaatata                                     | reverse primer used for EMSA           |
| M-R6-for                          | tatatgttatataac gatag                                    | forward primer used for EMSA           |
| M-R6-rev                          | ctatcgttatataacaatata                                    | reverse primer used for EMSA           |
| M-L1-R6-for                       | tataggttatataacgatag                                     | forward primer used for EMSA           |

|                |                                     |                                    |
|----------------|-------------------------------------|------------------------------------|
| M-L1-R6-rev    | ctatcgttatataacctata                | reverse primer used for EMSA       |
| qlacZ-for      | atatgctatcatggagtaatggatagttagatt   | forward qRT-PCR primer for lacZ    |
| qlacZ-rev      | atatggatacctttgtacgcacatctctattggat | reverse qRT-PCR primer for lacZ    |
| qCAC2679-for   | ttaaacgaacctgcaacttcta              | forward qRT-PCR primer for CAC2679 |
| qCAC2679-rev   | cccttagcccatttattctaca              | reverse qRT-PCR primer for CAC2679 |
| qCAC3037-for-1 | gtaatggaagcaattaa                   | forward qRT-PCR primer for CAC3037 |
| qCAC3037-rev-1 | tttcttcgatatactaaa                  | reverse qRT-PCR primer for CAC3037 |
| qCAC3037-for-2 | ggtggttgaaggctataga                 | forward qRT-PCR primer for CAC3037 |
| qCAC3037-rev-2 | gttgctctattgtagtaagc                | reverse qRT-PCR primer for CAC3037 |
| ccpA-outer-Dw  | tgtaaataactccatcaaccatct            | For 5'-RACE                        |
| ccpA-inner-Dw  | tctccttaagaactctaataat              | For 5'-RACE                        |

---

Figure S1

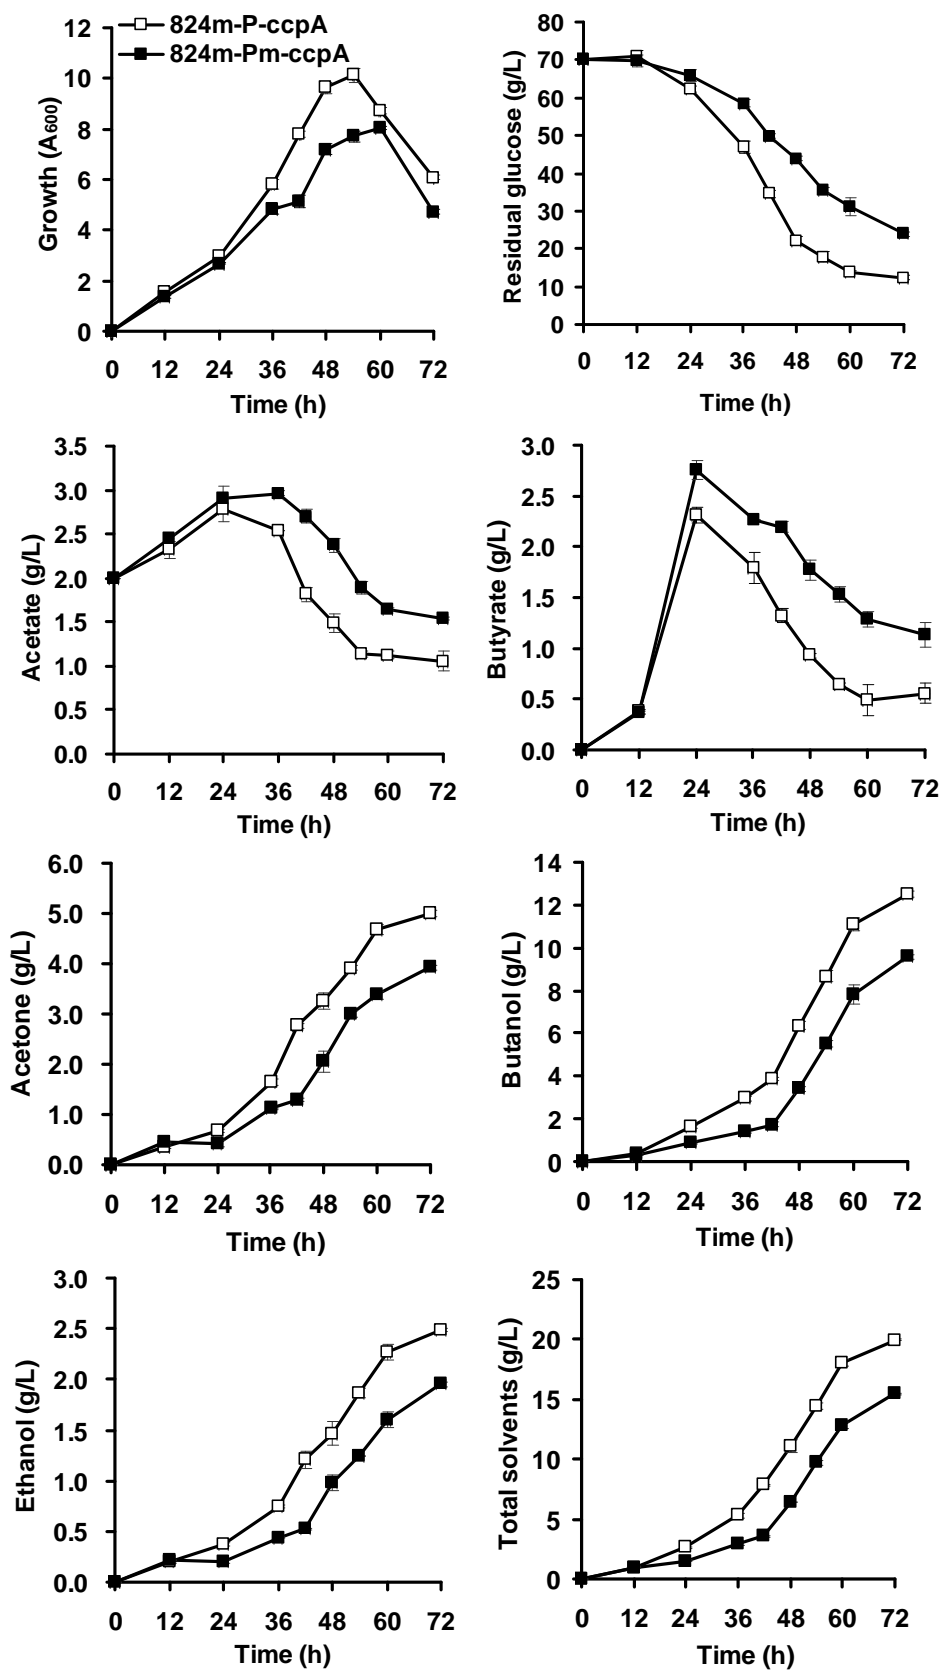

Figure S1. The phenotypic changes caused by mutation of the *cre-p* sited in the

***ccpA* promoter region.** Fermentations were carried out using glucose as the sole carbon resource. 824m-P-*ccpA*: the *ccpA*-mutated *C. acetobutylicum* strain harboring an expression plasmid that carried the *ccpA* gene and its native promoter. 824m-Pm-*ccpA*: same as the 824m-P-*ccpA* strain except that the *cre-p* site in the promoter was mutated. Total solvents represent the sum of acetone, butanol and ethanol. The mean of three independent biological replicates and the standard deviation are shown.

Figure S2

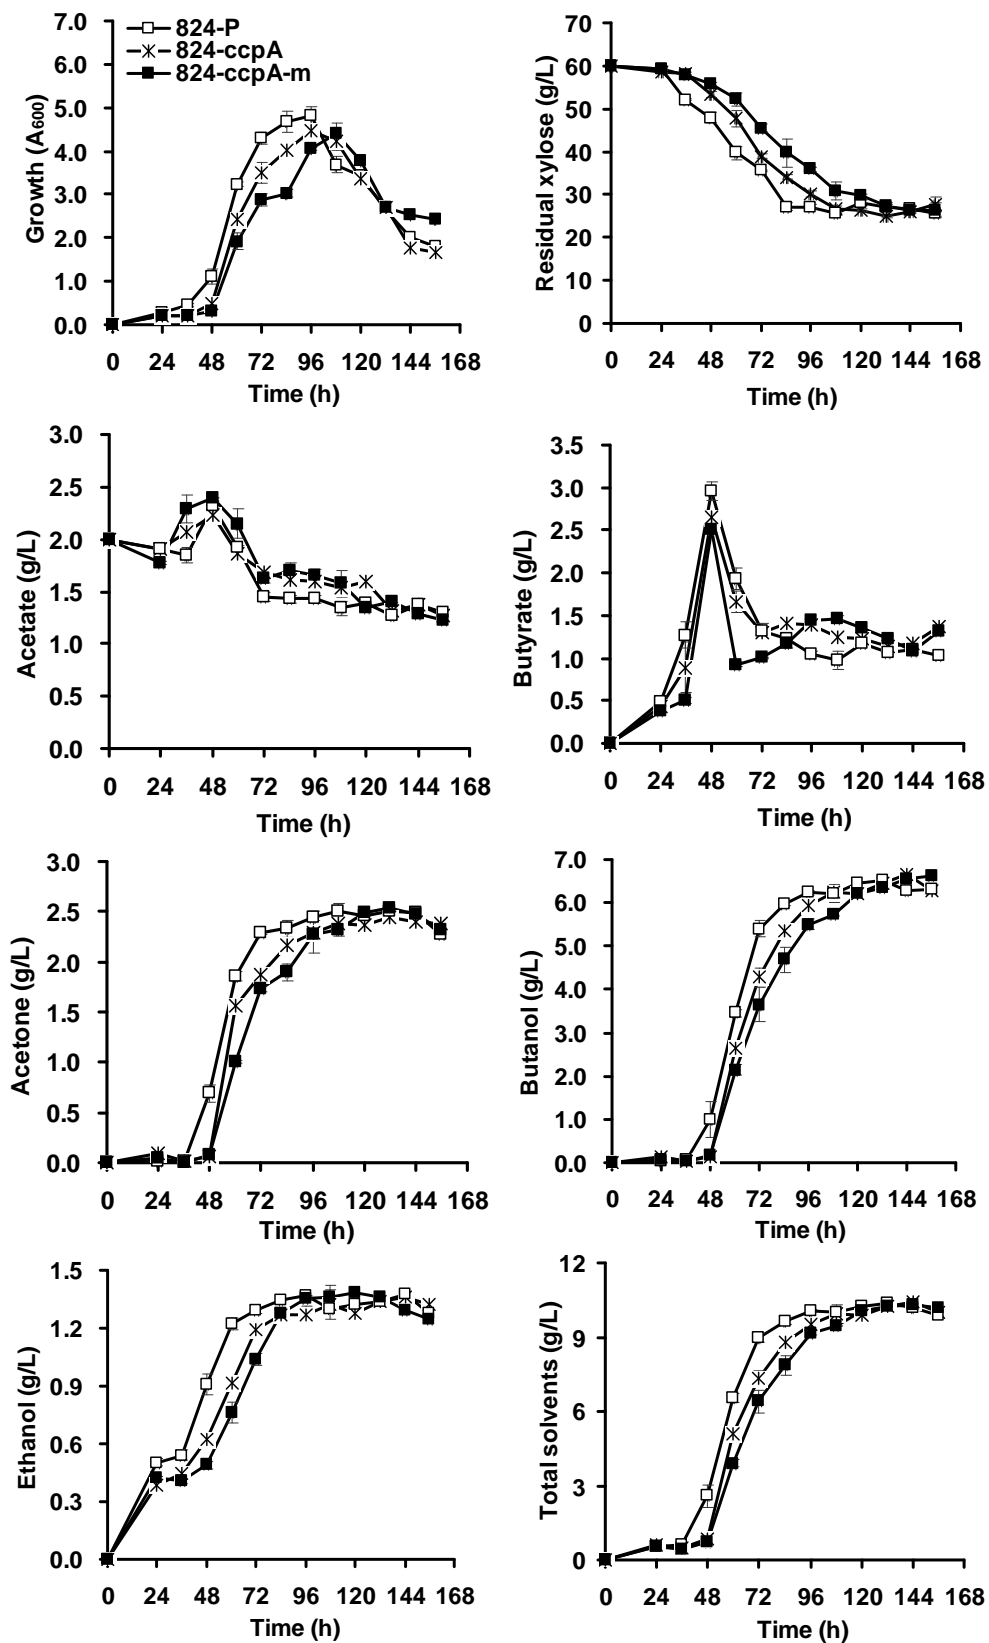

Figure S2. The fermentation profiles of the *ccpA*-overexpressed strains and

**wild-type strain using xylose as the sole carbon resource.** 824-P: the wild-type *C. acetobutylicum* strain harboring a control plasmid pIMP1-P<sub>thl</sub>. 824-ccpA: the *C. acetobutylicum* strain harboring the plasmid pIMP1-P<sub>thl</sub>-ccpA that carried wild-type *ccpA* gene for overexpression. 824-ccpA-m: the *C. acetobutylicum* strain harboring the plasmid pIMP1-P<sub>thl</sub>-ccpA<sub>mut</sub> that carried the *cre*-ORF-mutated *ccpA* gene for overexpression. Total solvents represent the sum of acetone, butanol and ethanol. The mean of three independent biological replicates and the standard deviation are shown.

**Figure S3**

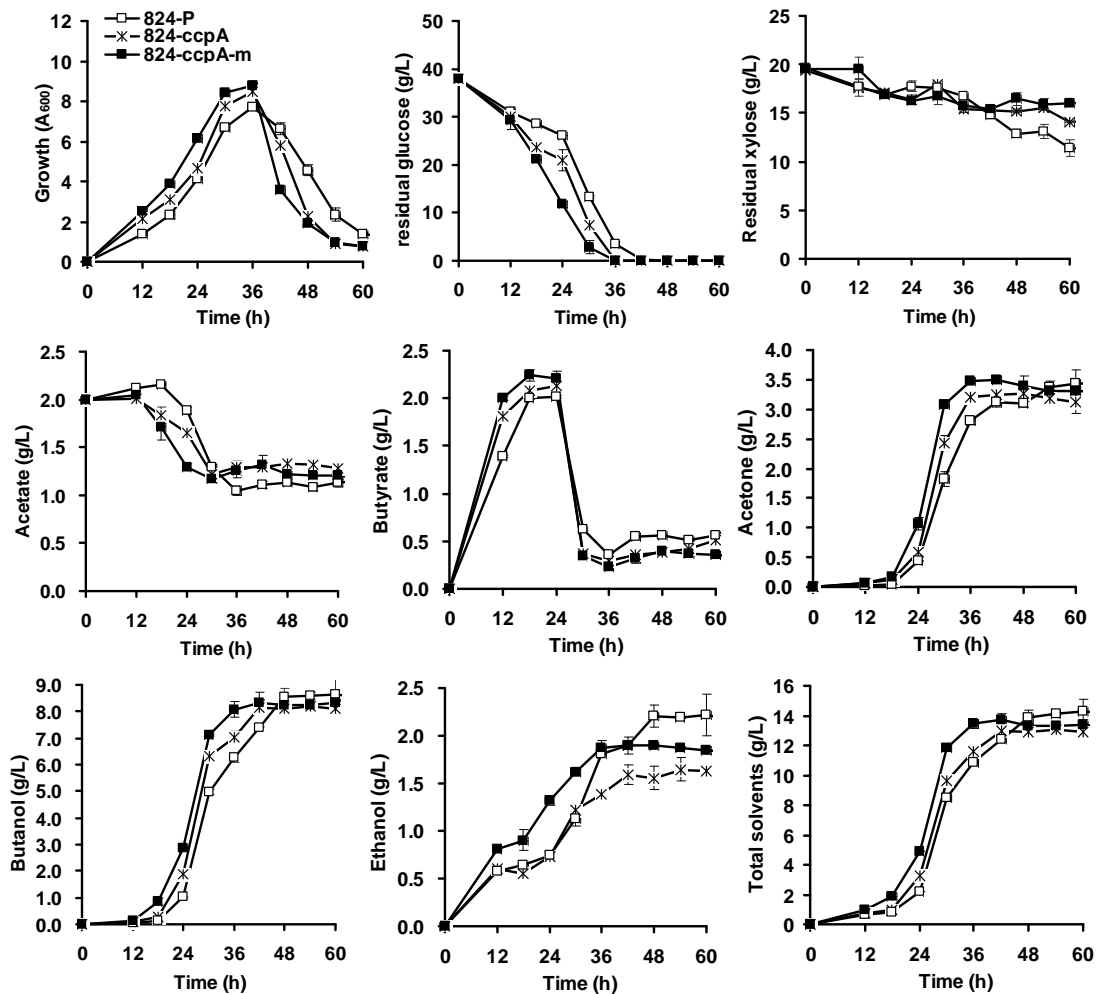

**Figure S3. The fermentation profiles of the *ccpA*-overexpressed strains and wild-type strain using the mixture of glucose and xylose as carbon resources.** 824-P: the wild-type *C. acetobutylicum* strain harboring a control plasmid pIMP1- $P_{thl}$ . 824-ccpA: the *C. acetobutylicum* strain harboring the plasmid pIMP1- $P_{thl}$ -ccpA that carried wild-type *ccpA* gene for overexpression. 824-ccpA-m: the *C. acetobutylicum* strain harboring the plasmid pIMP1- $P_{thl}$ -ccpA<sub>mut</sub> that carried the *cre*-ORF-mutated *ccpA* gene for overexpression. Total solvents represent the sum of acetone, butanol and ethanol. The mean of three independent biological replicates and the standard deviation are shown.
